# Supplementary material for: Examining the spatial and temporal variation of groundwater inflows to a valley-to-floodplain river using 222 Rn, geochemistry and river discharge: the Ovens River, southeast Australia
Source: Copernicus journal article supplement (doi:10.5194/hess-17-4907-2013), 2013-12-06
Supplement: Supplementary file 1 [file Paper 1 - Supplement.doc]

| Site No. | Site Name | Easting | Northing | Distance a km | EC  µS/cm | Cl  mg/L | NO3  mg/L | SO4  mg/L | HCO3  mg/L | Na  mg/L | Mg  mg/L | K  mg/L | Ca  mg/L |
| --- | --- | --- | --- | --- | --- | --- | --- | --- | --- | --- | --- | --- | --- |
| September 2009 | | | | | | | | | | | | | |
| Ovens River | | | | | | | | | | | | | |
| SW19 | Bundalong | 042773 | 6007835 | 202 | 37.8 | 2.47 | 0.61 | 1.24 | nm | 3.31 | 1.23 | 0.95 | 1.47 |
| SW18 | Peechelba | 043119 | 5997555 | 187 | 26.3 | 2.39 | 0.47 | 1.33 | 4 | 3.28 | 1.28 | 0.83 | 1.57 |
| SW17 | Killawara | 043417 | 5984065 | 165 | 34.7 | 2.39 | 0.53 | 1.25 | nm | 3.3 | 1.24 | 0.79 | 1.54 |
| SW16 | Wangaratta | 043861 | 5956675 | 140 | 33.1 | 2.34 | 0.57 | 1.1 | nm | 3.01 | 1.26 | 0.78 | 1.55 |
| SW15 | South Wang | 044237 | 5974395 | 127 | 33.7 | 1.91 | 0.62 | 1.01 | 5 | 2.84 | 1.46 | 0.62 | 1.48 |
| SW14 | Tarrawingee | 045113 | 5970115 | 115 | 30.4 | 1.81 | 0.47 | 0.91 | 12 | 2.83 | 1.47 | 0.60 | 1.45 |
| SW13 | Everton | 045732 | 5966695 | 97 | 32.2 | 1.88 | 0.59 | 0.99 | nm | 2.79 | 1.42 | 0.58 | 1.46 |
| SW12 | Whorley | 046451 | 5959045 | 80 | 31.7 | 1.9 | 0.6 | 0.99 | nm | 2.81 | 1.39 | 0.62 | 1.45 |
| SW11 | Whorley East | 047013 | 5966685 | 72 | 32.4 | 1.96 | 0.78 | 1.11 | nm | 2.66 | 1.43 | 0.58 | 1.45 |
| SW10 | Myrtleford | 047453 | 5952805 | 65 | 30.3 | 1.54 | 0.36 | 0.73 | 21 | 2.44 | 1.38 | 0.49 | 1.25 |
| SW9 | Salziers Ln | 047837 | 5949855 | 57 | 30.1 | 1.61 | 0.43 | 0.78 | nm | 2.53 | 1.48 | 0.48 | 1.37 |
| SW8 | Ovens | 048239 | 5947285 | 50 | 33 | 1.49 | 0.44 | 0.79 | 10 | 2.4 | 1.49 | 0.46 | 1.47 |
| SW7 | Eurobin | 048684 | 5945025 | 47 | 39.3 | 1.47 | 0.27 | 0.8 | nm | 2.49 | 1.49 | 0.47 | 1.33 |
| SW6 | Porepunkah N | 048833 | 5941035 | 39 | 29.7 | 1.5 | 0.37 | 0.85 | nm | 2.5 | 1.47 | 0.47 | 1.37 |
| SW5 | Porepunkah | 049182 | 5938925 | 34 | 30.2 | 1.31 | 0.36 | 0.84 | 23 | 2.47 | 1.64 | 0.44 | 1.49 |
| SW4 | Bright | 049936 | 5935505 | 22 | 31.6 | 1.39 | 0.38 | 0.83 | 74 | 2.49 | 1.7 | 0.43 | 1.6 |
| SW3 | Smoko | 050568 | 5927365 | 11 | 24.7 | 1.09 | 0.01 | 0.73 | 18 | 2.16 | 1.55 | 0.36 | 1.49 |
| SW2 | Trout Farm | 050560 | 5918975 | 5 | 30.4 | 0.99 | 0.2 | 0.78 | 11 | 2.09 | 1.68 | 0.36 | 1.49 |
| SW1 | Harrietville | 050566 | 5917175 | 0 | 28.2 | 1.03 | 0.24 | 0.49 | nm | 1.87 | 1.35 | 0.31 | 1.43 |
| Tributaries | | | | | | | | | | | | | |
| SW22 | King @ Oxley | 044442 | 5966735 |  | 33.0 | 2.77 | 0.56 | 1.01 | nm | 3.09 | 1.41 | 0.88 | 0.84 |
| SW21 | Buffalo @ Myrtleford | 047182 | 5954215 |  | 34.8 | 2.12 | 0.7 | 1.08 | nm | 2.65 | 1.58 | 0.64 | 1.33 |
| SW20 | Buckland @ Porepunkah | 049049 | 5938625 |  | 33.2 | 1.52 | 0.26 | 0.73 | nm | 2.49 | 1.38 | 0.49 | 1.41 |
| March 2010 | | | | | | | | | | | | | |
| Ovens River | | | | | | | | | | | | | |
| SW19 | Bundalong | 042773 | 6007835 | 202 | 39.9 | 2.30 | 0.04 | 1.16 |  | 4.52 | 1.77 | 0.85 | 1.58 |
| SW18 | Peechelba | 043119 | 5997555 | 187 | 45.6 | 2.29 | 0.02 | 1.05 |  | 4.27 | 1.73 | 0.82 | 1.61 |
| SW17 | Killawara | 043417 | 5984065 | 165 | 55.9 | 2.55 | 0.18 | 0.87 |  | 4.33 | 1.73 | 0.73 | 1.59 |
| SW16 | Wangaratta | 043861 | 5956675 | 140 | 42.7 | 1.96 | 0.09 | 0.78 |  | 3.99 | 1.7 | 0.71 | 1.57 |
| SW15 | South Wang | 044237 | 5974395 | 127 | 52.6 | 1.99 | 0.09 | 0.97 |  | 4.01 | 1.72 | 0.67 | 1.55 |
| SW14 | Tarrawingee | 045113 | 5970115 | 115 | 40.5 | 1.78 | 0.09 | 0.90 |  | 4.04 | 1.7 | 0.69 | 1.54 |
| SW13 | Everton | 045732 | 5966695 | 97 | 46.5 | 1.80 | 0.20 | 0.95 |  | 3.79 | 1.61 | 0.6 | 1.58 |
| SW12 | Whorley | 046451 | 5959045 | 80 | 40.3 | 1.73 | 0.17 | 0.97 |  | 3.78 | 1.59 | 0.62 | 1.53 |
| SW11 | Whorley East | 047013 | 5966685 | 72 | 40.6 | 1.68 | 0.24 | 0.95 |  | 3.71 | 1.56 | 0.65 | 1.51 |
| SW10 | Myrtleford | 047453 | 5952805 | 65 | 47.9 | 1.37 | 0.13 | 0.77 |  | 3.67 | 1.49 | 0.57 | 1.58 |
| SW9 | Salziers Ln | 047837 | 5949855 | 57 | 84.7 | 1.32 | 0.24 | 0.77 |  | 3.61 | 1.56 | 0.54 | 1.56 |
| SW8 | Ovens | 048239 | 5947285 | 50 | 38.5 | 1.30 | 0.18 | 0.75 |  | 3.58 | 1.56 | 0.5 | 1.52 |
| SW7 | Eurobin | 048684 | 5945025 | 47 | 53.7 | 1.43 | 0.16 | 0.68 |  | 3.52 | 1.52 | 0.51 | 1.54 |
| SW6 | Porepunkah N | 048833 | 5941035 | 39 | 36.6 | 1.15 | 0.11 | 0.62 |  | 3.55 | 1.51 | 0.53 | 1.50 |
| SW5 | Porepunkah | 049182 | 5938925 | 34 | 46.4 | 1.25 | 0.08 | 0.71 |  | 3.46 | 1.52 | 0.47 | 1.51 |
| SW4 | Bright | 049936 | 5935505 | 22 | 44.4 | 1.03 | 0.01 | 0.70 |  | 3.32 | 1.35 | 0.43 | 1.68 |
| SW3 | Smoko | 050568 | 5927365 | 11 | 39.7 | 0.85 | 0.02 | 0.79 |  | 3.17 | 1.49 | 0.40 | 1.57 |
| SW2 | Trout Farm | 050560 | 5918975 | 5 | 41.9 | 0.82 | 0.01 | 0.86 |  | 3.03 | 1.47 | 0.39 | 1.57 |
| SW1 | Harrietville | 050566 | 5917175 | 0 | 36.0 | 0.67 | 0.02 | 0.58 |  | 2.84 | 1.42 | 0.36 | 1.55 |
| Tributaries | | | | | | | | | | | | | |
| SW22 | King @ Oxley | 044442 | 5966735 |  | 37.7 | 2.10 | 0.11 | 0.54 |  | 3.65 | 1.41 | 0.54 | 1.41 |
| SW21 | Buffalo @ Myrtleford | 047182 | 5954215 |  | 37.3 | 1.64 | 0.35 | 0.85 |  | 3.21 | 1.58 | 0.52 | 1.39 |
| SW20 | Buckland @ Porepunkah | 049049 | 5938625 |  | 34.1 | 1.05 | 0.11 | 0.61 |  | 3.43 | 1.38 | 0.35 | 1.31 |
| June 2010 | | | | | | | | | | | | | |
| Ovens River | | | | | | | | | | | | | |
| SW19 | Bundalong | 042773 | 6007835 | 202 | 47.3 | 1.62 | 0.12 | 0.84 |  | 5.69 | 1.56 | 0.90 | 1.68 |
| SW18 | Peechelba | 043119 | 5997555 | 187 | 42.8 | 1.95 | 0.15 | 0.71 |  | 4.24 | 1.52 | 0.77 | 1.63 |
| SW17 | Killawara | 043417 | 5984065 | 165 | 47.3 | 1.77 | 0.18 | 0.65 |  | 3.77 | 1.46 | 0.66 | 1.59 |
| SW16 | Wangaratta | 043861 | 5956675 | 140 | 42.3 | 1.59 | 0.13 | 1.01 |  | 3.89 | 1.52 | 0.64 | 1.73 |
| SW15 | South Wang | 044237 | 5974395 | 127 | 37.8 | 1.65 | 0.11 | 0.75 |  | 3.25 | 1.60 | 0.54 | 1.48 |
| SW14 | Tarrawingee | 045113 | 5970115 | 115 | 36.8 | 1.63 | 0.09 | 0.88 |  | 3.16 | 1.56 | 0.52 | 1.44 |
| SW13 | Everton | 045732 | 5966695 | 97 | 36.1 | 1.54 | 0.01 | 0.70 |  | 3.20 | 1.56 | 0.52 | 1.45 |
| SW12 | Whorley | 046451 | 5959045 | 80 | 38.4 | 1.57 | 0.09 | 0.78 |  | 3.23 | 1.54 | 0.51 | 1.45 |
| SW11 | Whorley East | 047013 | 5966685 | 72 | 37.7 | 1.63 | 0.01 | 0.86 |  | 3.10 | 1.40 | 0.52 | 1.30 |
| SW10 | Myrtleford | 047453 | 5952805 | 65 | 33.8 | 1.51 | 0.09 | 0.90 |  | 2.68 | 1.53 | 0.37 | 1.28 |
| SW9 | Salziers Ln | 047837 | 5949855 | 57 | 33.2 | 1.52 | 0.17 | 0.97 |  | 3.08 | 1.67 | 0.37 | 1.37 |
| SW8 | Ovens | 048239 | 5947285 | 50 | 32.7 | 1.47 | 0.04 | 0.88 |  | 2.70 | 1.64 | 0.35 | 1.39 |
| SW7 | Eurobin | 048684 | 5945025 | 47 | 32.3 | 1.51 | 0.02 | 0.79 |  | 2.68 | 1.60 | 0.34 | 1.32 |
| SW6 | Porepunkah N | 048833 | 5941035 | 39 | 33.7 | 1.48 | 0.18 | 0.75 |  | 2.72 | 1.61 | 0.34 | 1.33 |
| SW5 | Porepunkah | 049182 | 5938925 | 34 | 34.1 | 1.42 | 0.35 | 0.85 |  | 2.95 | 1.96 | 0.34 | 1.67 |
| SW4 | Bright | 049936 | 5935505 | 22 | 36.5 | 1.32 | 0.11 | 0.62 |  | 3.03 | 1.88 | 0.32 | 1.71 |
| SW3 | Smoko | 050568 | 5927365 | 11 | 32.1 | 1.28 | 0.02 | 0.47 |  | 3.45 | 1.84 | 0.33 | 1.36 |
| SW2 | Trout Farm | 050560 | 5918975 | 5 | 34.6 | 1.31 | 0.11 | 0.49 |  | 3.08 | 1.99 | 0.36 | 1.71 |
| SW1 | Harrietville | 050566 | 5917175 | 0 | 30.6 | 1.25 | 0.09 | 0.41 |  | 2.52 | 1.58 | 0.21 | 1.50 |
| Tributaries | | | | | | | | | | | | | |
| SW22 | King @ Oxley | 044442 | 5966735 |  | 42.6 | 2.21 | 0.31 | 0.32 |  | 4.15 | 1.20 | 0.87 | 2.08 |
| SW21 | Buffalo @ Myrtleford | 047182 | 5954215 |  | 37.6 | 1.61 | 0.24 | 0.95 |  | 2.94 | 1.35 | 0.54 | 1.31 |
| SW20 | Buckland @ Porepunkah | 049049 | 5938625 |  | 30.7 | 1.57 | 0.11 | 0.54 |  | 3.01 | 1.53 | 0.37 | 1.21 |
| September 2010 | | | | | | | | | | | | | |
| Ovens River | | | | | | | | | | | | | |
| SW19 | Bundalong | 042773 | 6007835 | 202 | 50.5 | 2.51 | 0.32 | 0.37 |  | 4.14 | 1.86 | 1.00 | 1.92 |
| SW18 | Peechelba | 043119 | 5997555 | 187 | 49.3 | 2.48 | 0.66 | 0.77 |  | 4.23 | 1.85 | 0.96 | 1.91 |
| SW17 | Killawara | 043417 | 5984065 | 165 | 49.6 | 2.32 | 0.71 | 0.82 |  | 4.12 | 1.80 | 0.94 | 1.89 |
| SW16 | Wangaratta | 043861 | 5956675 | 140 | 45.2 | 2.41 | 0.53 | 0.61 |  | 3.83 | 1.77 | 0.90 | 1.88 |
| SW15 | South Wang | 044237 | 5974395 | 127 | 44.1 | 2.33 | 0.62 | 0.72 |  | 3.57 | 1.85 | 0.70 | 1.65 |
| SW14 | Tarrawingee | 045113 | 5970115 | 115 | 42.4 | 2.35 | 0.29 | 0.34 |  | 3.49 | 1.83 | 0.71 | 1.64 |
| SW13 | Everton | 045732 | 5966695 | 97 | 43.3 | 2.22 | 0.66 | 0.77 |  | 3.41 | 1.82 | 0.68 | 1.63 |
| SW12 | Whorley | 046451 | 5959045 | 80 | 40.4 | 2.17 | 0.43 | 0.50 |  | 3.25 | 1.79 | 0.65 | 1.62 |
| SW11 | Whorley East | 047013 | 5966685 | 72 | 38.1 | 2.26 | 0.83 | 0.96 |  | 3.31 | 1.79 | 0.63 | 1.42 |
| SW10 | Myrtleford | 047453 | 5952805 | 65 | 34.2 | 2.20 | 0.60 | 0.70 |  | 2.72 | 1.63 | 0.53 | 1.35 |
| SW9 | Salziers Ln | 047837 | 5949855 | 57 | 35.3 | 2.19 | 0.38 | 0.44 |  | 2.70 | 1.68 | 0.53 | 1.40 |
| SW8 | Ovens | 048239 | 5947285 | 50 | 34.8 | 2.32 | 0.47 | 0.55 |  | 3.69 | 1.71 | 0.56 | 1.46 |
| SW7 | Eurobin | 048684 | 5945025 | 47 | 33.3 | 2.13 | 0.20 | 0.23 |  | 2.67 | 1.62 | 0.50 | 1.31 |
| SW6 | Porepunkah N | 048833 | 5941035 | 39 | 32.8 | 2.01 | 0.36 | 0.42 |  | 2.64 | 1.61 | 0.49 | 1.33 |
| SW5 | Porepunkah | 049182 | 5938925 | 34 | 36.1 | 1.98 | 0.43 | 0.50 |  | 2.69 | 1.80 | 0.49 | 1.50 |
| SW4 | Bright | 049936 | 5935505 | 22 | 34.0 | 1.89 | 0.37 | 0.43 |  | 2.46 | 1.67 | 0.45 | 1.49 |
| SW3 | Smoko | 050568 | 5927365 | 11 | 31.4 | 1.88 | 0.24 | 0.28 |  | 2.20 | 1.63 | 0.37 | 1.47 |
| SW2 | Trout Farm | 050560 | 5918975 | 5 | 33.2 | 1.87 | 0.47 | 0.55 |  | 2.18 | 1.72 | 0.38 | 1.44 |
| SW1 | Harrietville | 050566 | 5917175 | 0 | 32.9 | 1.92 | 0.01 | 0.01 |  | 2.18 | 1.38 | 0.32 | 1.29 |
| Tributaries | | | | | | | | | | | | | |
| SW22 | King @ Oxley | 044442 | 5966735 |  | 43.7 | 2.31 | 0.57 | 0.66 |  | 3.87 | 1.34 | 1.10 | 1.99 |
| SW21 | Buffalo @ Myrtleford | 047182 | 5954215 |  | 36.6 | 2.31 | 1.32 | 1.53 |  | 2.86 | 1.58 | 0.62 | 1.40 |
| SW20 | Buckland @ Porepunkah | 049049 | 5938625 |  | 30.0 | 1.76 | 1.36 | 1.58 |  | 2.51 | 1.40 | 0.48 | 1.15 |
| December 2010 | | | | | | | | | | | | | |
| Ovens River | | | | | | | | | | | | | |
| SW19 | Bundalong | 042773 | 6007835 | 202 | nm | nm | nm | nm |  | nm | nm | nm | nm |
| SW18 | Peechelba | 043119 | 5997555 | 187 | 61.6 | 5.00 | 0.45 | 1.17 |  | 4.80 | 2.27 | 3.00 | 3.03 |
| SW17 | Killawara | 043417 | 5984065 | 165 | 60.3 | 4.64 | 0.46 | 1.23 |  | 4.80 | 2.05 | 2.64 | 3.16 |
| SW16 | Wangaratta | 043861 | 5956675 | 140 | 56.2 | 4.39 | 0.46 | 1.04 |  | 4.61 | 1.97 | 2.62 | 3.02 |
| SW15 | South Wang | 044237 | 5974395 | 127 | 41 | 2.80 | 0.33 | 0.97 |  | 4.03 | 1.84 | 0.80 | 2.09 |
| SW14 | Tarrawingee | 045113 | 5970115 | 115 | 57.6 | 3.64 | 0.57 | 1.01 |  | 4.26 | 1.59 | 2.65 | 2.93 |
| SW13 | Everton | 045732 | 5966695 | 97 | 40 | 2.72 | 0.31 | 1.08 |  | 3.68 | 1.74 | 0.98 | 1.96 |
| SW12 | Whorley | 046451 | 5959045 | 80 | 38.6 | 2.44 | 0.29 | 0.92 |  | 3.59 | 1.79 | 0.70 | 1.72 |
| SW11 | Whorley East | 047013 | 5966685 | 72 | 37.5 | 2.38 | 0.41 | 0.85 |  | 3.70 | 1.83 | 0.73 | 1.79 |
| SW10 | Myrtleford | 047453 | 5952805 | 65 | 35 | 1.50 | 0.33 | 0.69 |  | 3.34 | 1.81 | 0.60 | 1.64 |
| SW9 | Salziers Ln | 047837 | 5949855 | 57 | 35.9 | 1.66 | 0.29 | 0.73 |  | 3.53 | 1.93 | 0.65 | 1.74 |
| SW8 | Ovens | 048239 | 5947285 | 50 | 34.5 | 2.30 | 0.23 | 0.70 |  | 3.72 | 1.88 | 0.64 | 1.65 |
| SW7 | Eurobin | 048684 | 5945025 | 47 | 34.2 | 1.41 | 0.24 | 0.66 |  | 3.25 | 1.84 | 0.52 | 1.55 |
| SW6 | Porepunkah N | 048833 | 5941035 | 39 | 34 | 1.38 | 0.09 | 0.65 |  | 3.24 | 1.85 | 0.51 | 1.58 |
| SW5 | Porepunkah | 049182 | 5938925 | 34 | 37.1 | 1.44 | 0.24 | 0.77 |  | 3.42 | 2.06 | 0.52 | 1.79 |
| SW4 | Bright | 049936 | 5935505 | 22 | 36.8 | 1.56 | 0.13 | 0.69 |  | 3.10 | 2.03 | 0.51 | 1.88 |
| SW3 | Smoko | 050568 | 5927365 | 11 | 33.8 | 1.27 | 0.07 | 0.76 |  | 2.85 | 2.00 | 0.42 | 1.74 |
| SW2 | Trout Farm | 050560 | 5918975 | 5 | 34.2 | 1.00 | 0.07 | 0.89 |  | 2.78 | 2.10 | 0.42 | 1.77 |
| SW1 | Harrietville | 050566 | 5917175 | 0 | 28.4 | 0.78 | 0.03 | 0.45 |  | 2.39 | 1.65 | 0.30 | 1.59 |
| Tributaries | | | | | | | | | | | | | |
| SW22 | King @ Oxley | 044442 | 5966735 |  | 43.1 | 3.02 | 0.40 | 0.97 |  | 4.14 | 1.83 | 0.85 | 2.00 |
| SW21 | Buffalo @ Myrtleford | 047182 | 5954215 |  | 34.6 | 2.21 | 0.26 | 0.92 |  | 3.28 | 1.50 | 0.61 | 1.72 |
| SW20 | Buckland @ Porepunkah | 049049 | 5938625 |  | 32.8 | 1.39 | 0.03 | 0.62 |  | 3.11 | 1.66 | 0.46 | 1.60 |
| March 2011 | | | | | | | | | | | | | |
| Ovens River | | | | | | | | | | | | | |
| SW19 | Bundalong | 042773 | 6007835 | 202 | 54.7 | 4.03 | 0.66 | 1.26 |  | 7.31 | 2.35 | 1.64 | 3.84 |
| SW18 | Peechelba | 043119 | 5997555 | 187 | 57.0 | 3.82 | 0.05 | 1.12 |  | 7.45 | 2.32 | 1.61 | 3.79 |
| SW17 | Killawara | 043417 | 5984065 | 165 | 55.6 | 3.10 | 0.55 | 1.42 |  | 7.06 | 2.37 | 1.57 | 3.76 |
| SW16 | Wangaratta | 043861 | 5956675 | 140 | 52.4 | 3.19 | 0.40 | 0.97 |  | 6.42 | 2.00 | 1.44 | 3.72 |
| SW15 | South Wang | 044237 | 5974395 | 127 | 48.6 | 2.62 | 0.39 | 1.09 |  | 5.80 | 2.13 | 1.21 | 3.50 |
| SW14 | Tarrawingee | 045113 | 5970115 | 115 | 50.9 | 5.61 | 6.25 | 1.31 |  | 5.64 | 1.64 | 1.66 | 3.37 |
| SW13 | Everton | 045732 | 5966695 | 97 | 47.5 | 2.38 | 0.32 | 1.02 |  | 5.42 | 2.04 | 1.13 | 3.30 |
| SW12 | Whorley | 046451 | 5959045 | 80 | 44.6 | 2.01 | 0.34 | 0.94 |  | 5.12 | 2.02 | 1.03 | 3.13 |
| SW11 | Whorley East | 047013 | 5966685 | 72 | 43.5 | 1.89 | 0.40 | 0.85 |  | 4.98 | 1.97 | 1.04 | 3.10 |
| SW10 | Myrtleford | 047453 | 5952805 | 65 | 39.2 | 1.23 | 0.34 | 0.84 |  | 4.50 | 2.01 | 0.90 | 2.86 |
| SW9 | Salziers Ln | 047837 | 5949855 | 57 | 39.8 | 1.49 | 0.47 | 0.68 |  | 4.52 | 2.23 | 0.87 | 2.87 |
| SW8 | Ovens | 048239 | 5947285 | 50 | 40.7 | 1.21 | 0.50 | 0.79 |  | 4.50 | 2.20 | 0.87 | 2.83 |
| SW7 | Eurobin | 048684 | 5945025 | 47 | 38.9 | 1.44 | 0.43 | 0.60 |  | 4.60 | 2.36 | 0.88 | 2.87 |
| SW6 | Porepunkah N | 048833 | 5941035 | 39 | 39.3 | 1.36 | 0.31 | 0.56 |  | 4.34 | 2.26 | 0.78 | 2.73 |
| SW5 | Porepunkah | 049182 | 5938925 | 34 | 41.5 | 1.21 | 0.28 | 0.79 |  | 4.80 | 2.24 | 0.89 | 3.48 |
| SW4 | Bright | 049936 | 5935505 | 22 | 39.7 | 1.03 | 0.12 | 0.71 |  | 3.80 | 2.23 | 0.68 | 2.68 |
| SW3 | Smoko | 050568 | 5927365 | 11 | 37.4 | 0.75 | 0.09 | 0.84 |  | 3.81 | 2.33 | 0.56 | 2.85 |
| SW2 | Trout Farm | 050560 | 5918975 | 5 | 37.1 | 0.69 | 0.02 | 0.00 |  | 3.89 | 2.37 | 0.66 | 3.03 |
| SW1 | Harrietville | 050566 | 5917175 | 0 | 30.7 | 0.71 | 0.05 | 0.44 |  | 3.57 | 2.07 | 0.42 | 2.59 |
| Tributaries | | | | | | | | | | | | | |
| SW22 | King @ Oxley | 044442 | 5966735 |  | 50.8 | 3.20 | 0.45 | 1.15 |  | 6.18 | 2.20 | 1.21 | 3.42 |
| SW21 | Buffalo @ Myrtleford | 047182 | 5954215 |  | 39.2 | 3.34 | 1.24 | 1.55 |  | 4.45 | 2.17 | 0.91 | 2.95 |
| SW20 | Buckland @ Porepunkah | 049049 | 5938625 |  | 33.2 | 1.18 | 0.17 | 0.45 |  | 4.31 | 1.84 | 0.72 | 2.43 |
| June 2011 | | | | | | | | | | | | | |
| Ovens River | | | | | | | | | | | | | |
| SW19 | Bundalong | 042773 | 6007835 | 202 | 54.8 | 4.54 | 0.56 | 1.67 |  | 6.16 | 2.36 | 1.07 | 2.50 |
| SW18 | Peechelba | 043119 | 5997555 | 187 | 53.4 | 4.30 | 0.63 | 1.65 |  | 5.89 | 1.99 | 0.99 | 2.70 |
| SW17 | Killawara | 043417 | 5984065 | 165 | 61.9 | 3.89 | 0.63 | 1.37 |  | 5.35 | 1.98 | 0.89 | 2.35 |
| SW16 | Wangaratta | 043861 | 5956675 | 140 | 47.0 | 3.34 | 0.60 | 1.31 |  | 5.16 | 2.07 | 0.94 | 2.80 |
| SW15 | South Wang | 044237 | 5974395 | 127 | 48.8 | 2.61 | 0.50 | 1.29 |  | 4.47 | 2.13 | 0.84 | 2.69 |
| SW14 | Tarrawingee | 045113 | 5970115 | 115 | 48.6 | 3.12 | 0.37 | 0.84 |  | 4.34 | 1.31 | 0.99 | 2.33 |
| SW13 | Everton | 045732 | 5966695 | 97 | 46.6 | 2.48 | 0.65 | 1.27 |  | 4.42 | 2.15 | 0.72 | 2.19 |
| SW12 | Whorley | 046451 | 5959045 | 80 | 33.7 | 2.02 | 0.70 | 1.17 |  | 3.85 | 2.05 | 0.70 | 2.11 |
| SW11 | Whorley East | 047013 | 5966685 | 72 | 43.8 | 1.90 | 0.53 | 1.02 |  | 4.13 | 2.08 | 0.73 | 2.15 |
| SW10 | Myrtleford | 047453 | 5952805 | 65 | 40.3 | 1.40 | 0.59 | 0.87 |  | 3.71 | 2.00 | 0.53 | 1.73 |
| SW9 | Salziers Ln | 047837 | 5949855 | 57 | 38.2 | 1.39 | 0.50 | 0.88 |  | 3.67 | 2.08 | 0.55 | 1.94 |
| SW8 | Ovens | 048239 | 5947285 | 50 | 37.6 | 1.39 | 0.54 | 0.85 |  | 3.51 | 2.09 | 0.51 | 1.83 |
| SW7 | Eurobin | 048684 | 5945025 | 47 | 37.0 | 1.32 | 0.40 | 0.73 |  | 3.66 | 2.04 | 0.48 | 1.72 |
| SW6 | Porepunkah N | 048833 | 5941035 | 39 | 35.9 | 1.35 | 0.33 | 0.80 |  | 3.40 | 1.83 | 0.44 | 1.81 |
| SW5 | Porepunkah | 049182 | 5938925 | 34 | 41.0 | 1.25 | 0.41 | 0.75 |  | 3.79 | 2.06 | 0.45 | 2.18 |
| SW4 | Bright | 049936 | 5935505 | 22 | 39.0 | 1.21 | 0.14 | 0.87 |  | 3.71 | 2.22 | 0.47 | 2.04 |
| SW3 | Smoko | 050568 | 5927365 | 11 | 36.9 | 0.92 | 0.27 | 0.72 |  | 3.36 | 2.21 | 0.39 | 2.09 |
| SW2 | Trout Farm | 050560 | 5918975 | 5 | 39.0 | 0.95 | 0.33 | 0.97 |  | 3.14 | 2.33 | 0.35 | 1.91 |
| SW1 | Harrietville | 050566 | 5917175 | 0 | 31.1 | 0.81 | 0.25 | 0.62 |  | 2.89 | 1.86 | 0.38 | 2.03 |
| Tributaries | | | | | | | | | | | | | |
| SW22 | King @ Oxley | 044442 | 5966735 |  | 85.2 | 3.14 | 0.63 | 1.36 |  | 4.82 | 2.36 | 0.78 | 2.37 |
| SW21 | Buffalo @ Myrtleford | 047182 | 5954215 |  | 39.4 | 1.80 | 0.50 | 0.99 |  | 3.98 | 1.95 | 0.66 | 2.11 |
| SW20 | Buckland @ Porepunkah | 049049 | 5938625 |  | 31.6 | 1.17 | 0.46 | 0.72 |  | 3.41 | 1.75 | 0.44 | 1.48 |
| October 2011 | | | | | | | | | | | | | |
| Ovens River | | | | | | | | | | | | | |
| SW19 | Bundalong | 042773 | 6007835 | 202 | 72.4 | 4.93 | 0.00 | 1.98 |  | 5.16 | 1.74 | 1.12 | 2.76 |
| SW18 | Peechelba | 043119 | 5997555 | 187 | 73.1 | 5.05 | 0.05 | 2.55 |  | 5.07 | 1.71 | 1.09 | 2.64 |
| SW17 | Killawara | 043417 | 5984065 | 165 | 65.4 | 4.32 | 0.01 | 2.11 |  | 4.58 | 1.55 | 1.00 | 2.53 |
| SW16 | Wangaratta | 043861 | 5956675 | 140 | 59.2 | 3.90 | 0.01 | 1.34 |  | 3.97 | 1.54 | 1.01 | 2.61 |
| SW15 | South Wang | 044237 | 5974395 | 127 | 61.1 | 3.71 | 0.02 | 1.40 |  | 3.97 | 1.72 | 0.97 | 2.45 |
| SW14 | Tarrawingee | 045113 | 5970115 | 115 | 54.3 | 3.05 | 0.03 | 1.35 |  | 3.72 | 1.65 | 0.94 | 2.42 |
| SW13 | Everton | 045732 | 5966695 | 97 | 52.7 | 3.11 | 0.13 | 1.23 |  | 3.50 | 1.51 | 0.93 | 2.28 |
| SW12 | Whorley | 046451 | 5959045 | 80 | 47.2 | 2.23 | 0.08 | 1.18 |  | 3.38 | 1.50 | 1.02 | 2.44 |
| SW11 | Whorley East | 047013 | 5966685 | 72 | 45.9 | 2.10 | 0.02 | 1.04 |  | 3.17 | 1.47 | 0.89 | 2.23 |
| SW10 | Myrtleford | 047453 | 5952805 | 65 | 38.8 | 1.47 | 0.18 | 0.84 |  | 2.97 | 1.46 | 1.06 | 2.17 |
| SW9 | Salziers Ln | 047837 | 5949855 | 57 | 39.1 | 1.45 | 0.02 | 0.84 |  | 2.63 | 1.47 | 0.75 | 1.95 |
| SW8 | Ovens | 048239 | 5947285 | 50 | 40.1 | 1.40 | 0.06 | 0.79 |  | 2.63 | 1.46 | 0.74 | 1.93 |
| SW7 | Eurobin | 048684 | 5945025 | 47 | 37.9 | 1.38 | 0.11 | 0.71 |  | 2.56 | 1.40 | 0.72 | 1.91 |
| SW6 | Porepunkah N | 048833 | 5941035 | 39 | 38.8 | 1.35 | 0.01 | 0.71 |  | 2.65 | 1.44 | 0.72 | 1.92 |
| SW5 | Porepunkah | 049182 | 5938925 | 34 | 43.0 | 1.34 | 0.01 | 0.78 |  | 2.83 | 1.69 | 0.73 | 2.28 |
| SW4 | Bright | 049936 | 5935505 | 22 | 41.5 | 1.15 | 0.32 | 0.86 |  | 2.65 | 1.64 | 0.69 | 2.26 |
| SW3 | Smoko | 050568 | 5927365 | 11 | 37.7 | 0.90 | 0.01 | 0.87 |  | 2.70 | 1.66 | 0.70 | 2.39 |
| SW2 | Trout Farm | 050560 | 5918975 | 5 | N/A | 0.89 | 0.09 | 0.96 |  | 2.82 | 1.67 | 0.73 | 2.44 |
| SW1 | Harrietville | 050566 | 5917175 | 0 | 32.9 | 0.76 | 0.02 | 0.60 |  | 2.42 | 1.43 | 0.61 | 2.20 |
| Tributaries | | | | | | | | | | | | | |
| SW22 | King @ Oxley | 044442 | 5966735 |  | 51.9 | 3.46 | 0.02 | 0.88 |  | 4.04 | 1.05 | 1.27 | 2.75 |
| SW21 | Buffalo @ Myrtleford | 047182 | 5954215 |  | 41 | 1.87 | 0.11 | 1.21 |  | 2.74 | 1.26 | 0.81 | 2.08 |
| SW20 | Buckland @ Porepunkah | 049049 | 5938625 |  | 34.9 | 1.20 | 0.01 | 0.63 |  | 2.43 | 1.18 | 0.68 | 1.74 |

**Supplementary Table 1.** Major ion chemistry of the Ovens River in the study period of September 2009 – October 2011. Note: nm - not measured; a - Distance from the uppermost sampling site, Harrietville.

| Bore No. | Location | Area | Easting | Northing | Bore Screen  Depth b  m | EC  µS/cm | Cl  mg/L | NO3  mg/L | SO4  mg/L | HCO3  mg/L | Na  mg/L | Mg  mg/L | K  mg/L | Ca  mg/L |
| --- | --- | --- | --- | --- | --- | --- | --- | --- | --- | --- | --- | --- | --- | --- |
| September 2009 | | | | | | | | | | | | | | |
| B51743 | Bright | Upper | 499291 | 5935508 | 5-11 | 82.1 | 2.80 | 2.89 | 0.55 | 40 | 5.35 | 4.30 | 0.75 | 3.37 |
| B51747 | Bright | Upper | 499190 | 5935414 | 2-20 | 58.1 | 3.10 | 5.36 | 0.21 | 13 | 3.03 | 2.01 | 0.61 | 1.66 |
| B51745 | Bright | Upper | 499139 | 5935375 | 5-11 | 63.1 | 2.16 | 2.41 | 0.75 | 19 | 2.25 | 2.51 | 0.85 | 1.83 |
| B51744 | Bright | Upper | 498933 | 5934911 | 6-12 | 56.3 | 2.73 | 7.33 | 1.00 | 30 | 5.21 | 3.11 | 0.99 | 3.20 |
| B51737 | Bright | Upper | 498445 | 5935658 | 36-42 | 110 | 2.41 | 0.14 | 0.62 | 60 | 7.57 | 6.02 | 0.81 | 4.64 |
| B51738 | Bright | Upper | 498397 | 5935420 | 58-63 | 199 | 2.39 | 0.01 | 0.27 | 88 | 16.6 | 6.21 | 0.95 | 4.70 |
| B51735 | Bright | Upper | 498391 | 5935314 | 30-42 | 74.4 | 3.58 | 0.79 | 0.60 | 28 | 4.88 | 2.69 | 0.84 | 2.46 |
| B51736 | Bright | Upper | 498382 | 5935299 | 20-26 | 53.1 | 3.29 | 1.30 | 0.26 | 23 | 4.53 | 2.48 | 0.72 | 1.69 |
| B109461 | Bright | Upper | 497818 | 5935267 | 20-26 | 82.8 | 3.42 | 4.52 | 0.54 | 43 | 5.88 | 4.04 | 1.30 | 4.19 |
| B109462 | Bright | Upper | 497818 | 5935267 | 45-51 | 100 | 3.48 | 0.40 | 0.30 | 44 | 5.88 | 4.41 | 0.91 | 4.58 |
| B88271 | Porepunkah | Upper | 493294 | 5938062 | 8-14 | 99.5 | 3.98 | 0.42 | 2.57 | 49 | 3.53 | 6.93 | 0.75 | 4.90 |
| B88274 | Porepunkah | Upper | 493256 | 5938067 | 35-53 | 64.3 | 1.85 | 0.22 | 0.78 | 30 | 4.24 | 3.59 | 0.70 | 2.14 |
| B48069 | Eurobin | Middle | 487803 | 5944698 | 5-8 | 129 | 3.59 | 0.07 | 9.60 | 35 | 8.39 | 3.35 | 1.14 | 2.36 |
| B48068 | Eurobin | Middle | 487657 | 5944643 | 7-13 | 74.3 | 3.52 | 0.09 | 2.63 | 20 | 3.39 | 2.36 | 1.99 | 1.73 |
| B48067 | Eurobin | Middle | 487519 | 5944594 | 12.0 | 92.1 | 4.14 | 14.2 | 0.71 | 15 | 4.16 | 3.57 | 1.08 | 2.91 |
| B48066 | Eurobin | Middle | 487411 | 5944553 | 9-15 | 77.9 | 3.90 | 17.1 | 0.69 | 9 | 3.28 | 2.92 | 1.35 | 2.45 |
| B83232 | Myrtleford | Middle | 474884 | 5953288 | 6-12 | 107 | 9.33 | 2.59 | 6.64 | 33 | 10.9 | 3.97 | 1.67 | 3.17 |
| B83231 | Myrtleford | Middle | 474704 | 5953010 | 8-14 | 49.1 | 2.08 | 1.46 | 3.19 | 24 | 3.53 | 2.48 | 0.72 | 2.09 |
| B83229 | Myrtleford | Middle | 474607 | 5952916 | 8-14 | 86.7 | 2.01 | 0.71 | 0.43 | 38 | 3.13 | 4.06 | 0.80 | 4.12 |
| B83230 | Myrtleford | Middle | 474604 | 5952937 | 8-14 | 45.1 | 1.87 | 0.57 | 1.56 | 22 | 3.21 | 2.13 | 0.59 | 1.86 |
| B102783 | Whorouly | Middle | 464087 | 5959833 | 5.1-11.27 | 107 | 2.06 | 0.28 | 0.07 | 63 | 10.3 | 5.67 | 0.66 | 4.52 |
| B110738 | Oxley | Lower | 444240 | 5966742 | 18.5-44 | 106 | 27.0 | 0.05 | 0.16 | 35 | 15.4 | 0.78 | 2.71 | 22 |
| B11326 | Wangaratta | Lower | 439879 | 5982755 | 23.7 | 1341 | 298 | 30.5 | 25.3 | 389 | 192 | 59.8 | 3.07 | 33.0 |
| B11493 | Wangaratta | Lower | 439422 | 5982189 | 16.5 | 920 | 134 | 0.00 | 14.8 | 322 | 134 | 27.1 | 0.64 | 12.4 |
| B302296 | Boorhamman East | Lower | 437925 | 5992950 | 70.5-77 | 567 | 115 | 0.03 | 0.91 | 123 | 95.2 | 4.52 | 2.53 | 7.40 |
| B11323 | Boorhamman East | Lower | 437924 | 5992953 | 17.4 | 536 | 95.9 | 0.62 | 4.80 | 155 | 89.2 | 3.93 | 1.40 | 27 |
| B50788 | Boorhamman | Lower | 442072 | 5999081 | 60-72 | 3800 | 923 | 1.67 | 214 | 333 | 654 | 61.4 | 7.02 | 59 |
| B50789 | Boorhamman | Lower | 442072 | 5999081 | 18-30 | 12020 | 3830 | 3.44 | 879 | 1250 | 2331 | 356 | 13.2 | 357 |
| B11306 | Peechelba | Lower | 432684 | 5994603 | 15.8 | 1194 | 299 | 2.36 | 37.7 | 151 | 163.5 | 51.0 | 1.70 | 10.6 |
| B11311 | Bundalong | Lower | 427007 | 6005559 | 16.2 | 2270 | 628 | 36.2 | 171.8 | 218 | 389 | 56.6 | 2.38 | 20.1 |
| B11310 | Bundalong | Lower | 427237 | 6005560 | 13.9 | 2250 | 570 | 31.3 | 159 | 220 | 378 | 61.0 | 3.14 | 25.0 |
| March 2011 | | | | | | | | | | | | | | |
| B1 | Bright | Upper | 499270 | 5935517 | 2-4 | 94.7 | 2.95 | 0.48 | 0.35 | 32 | 7.34 | 3.82 | 0.85 | 4.52 |
| B2 | Bright | Upper | 499260 | 5935513 | 2-4 | 82.0 | 2.87 | 0.78 | 0.30 | 24 | 7.42 | 3.56 | 0.92 | 4.28 |
| B51743 | Bright | Upper | 499291 | 5935508 | 5-11 | 75.9 | 3.32 | 3.00 | 0.46 | 33 | 9.25 | 4.54 | 1.05 | 5.20 |
| B51744 | Bright | Upper | 498933 | 5934911 | 6-12 | 60.0 | 4.51 | 6.23 | 1.46 | 24 | 6.97 | 3.29 | 1.54 | 3.31 |
| B88271 | Porepunkah | Upper | 493294 | 5938062 | 8-14 | 107 | 3.75 | 0.38 | 2.47 | nm | 6.36 | 8.52 | 1.09 | 8.21 |
| M1 | Myrtleford | Middle | 474605 | 5952919 | 4-6 | 90.0 | 2.37 | 0.29 | 4.96 | 17 | 7.46 | 3.18 | 0.96 | 3.44 |
| M2 | Myrtleford | Middle | 474605 | 5952936 | 4-6 | 67.6 | 2.43 | 3.54 | 4.87 | 23 | 8.21 | 4.67 | 1.39 | 5.25 |
| T1 | Tarrawingee | Lower | 451112 | 5970209 | 5-7 | 367 | 46.9 | 0.50 | 0.24 | 52 | 52 | 8.13 | 2.25 | 9.51 |
| T2 | Tarrawingee | Lower | 451121 | 5970212 | 5-7 | 364 | 47.8 | 1.05 | 0.36 | 45 | 54.9 | 7.39 | 3.76 | 10.5 |
| T3 | Tarrawingee | Lower | 451136 | 5970245 | 6-8 | 315 | 46 | 1.53 | 0.28 | 45 | 53.7 | 8.73 | 3.15 | 10.3 |
| B48066 | Eurobin | Middle | 487411 | 5944553 | 9-15 | 70.3 | 3.97 | 19 | 0.64 | nm | 6.19 | 4.13 | 2.38 | 4.01 |
| B48067 | Eurobin | Middle | 487519 | 5944594 | 12 | 77.4 | 3.24 | 21.6 | 0.74 | nm | 6.29 | 4.40 | 1.50 | 4.78 |
| B48068 | Eurobin | Middle | 487657 | 5944643 | 7-13 | 68.9 | 3.42 | 18.5 | 0.96 | nm | 7.50 | 4.47 | 1.16 | 4.00 |
| B48069 | Eurobin | Middle | 487803 | 5944698 | 5-8 | 122 | 4.07 | 0.10 | 7.50 | nm | 12.9 | 4.22 | 1.37 | 3.78 |

**Supplementary Table 2.** Major ion chemistry of groundwater in the Ovens Catchment in September 2009 and March 2010. Notes – b: if single value is reported, the value represents the depth of the middle of the bore screen below ground surface.

| Site No. | Site Name | EC  µS/cm | Cl  mg/L | NO3  mg/L | SO4  mg/L | Na  mg/L | Mg  mg/L | K  mg/L | Ca  mg/L |
| --- | --- | --- | --- | --- | --- | --- | --- | --- | --- |
| March 2011 | | | | | | | | | |
| SR | Spring fed Stream | 48.6 | 1.57 | 2.15 | 1.75 | 5.78 | 2.83 | 1.67 | 3.34 |
| SS | Spring | 64.1 | 1.85 | 0.02 | 1.02 | 4.91 | 4.15 | 2.01 | 5.72 |
| June 2011 | | | | | | | | | |
| SR | Spring fed Stream | 49.0 | 2.15 | 1.62 | 1.56 | 3.94 | 2.96 | 1.19 | 2.435 |
| SS | Spring | 52.2 | 2.21 | 1.26 | 0.65 | 4.13 | 3.26 | 0.91 | 2.943 |

**Supplementary Table 3.** Major ion chemistry of spring and spring fed stream at Location BC8
